# Supplementary material for: Crop-specific management history of phosphorus fertilizer input (CMH-P) in the croplands of the United States: reconciliation of top-down and bottom-up data sources
Source: Copernicus journal article supplement (doi:10.5194/essd-16-4557-2024), 2024-10-09
Supplement: Supplementary file 1 [file essd-16-4557-2024-supplement.pdf]

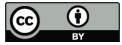

*Supplement of*

**Crop-specific management history of phosphorus fertilizer input (CMH-P) in the croplands of the United States: reconciliation of top-down and bottom-up data sources**

Peiyu Cao et al.

*Correspondence to:* Chaoqun Lu ([clu@iastate.edu](mailto:clu@iastate.edu))

The copyright of individual parts of the supplement might differ from the article licence.

**This supplementary material includes the following:**

- S1. Historical state-level P fertilizer consumption.
- S2. P fertilizer use in different lands in this study.
- S3. Historical national average crop-specific P fertilizer application rate.
- S4. Application timing and methods.
- S5. Divergence between top-down and bottom-up data sources.
- S6. Comparison of P fertilizer consumption across multiple data sources.
- S7. Fertilized area percentage of P fertilizer among crops in the US.

## S1. Historical state-level P fertilizer consumption

**Table S1.** Data sources for state-level P consumption

| Data sources          | Period    |
|-----------------------|-----------|
| Mehring et al. (1957) | 1930-1953 |
| USDA (1971)           | 1954-1969 |
| USDA (1977)           | 1976-1977 |
| NuGIS (2021)          | 1987-2016 |

## S2. P fertilizer use for different land use types in this study

P fertilizer can be used for different land use types in the US, including nonfarm, permanent pasture, cropland pasture, and crops (Table S2). We followed the approach used in Cao et al. (2018) and separated the nonfarm, permanent pasture, and cropland pasture P fertilizer consumption from total consumption for each state. Based on multiple data sources, we reconstructed the fraction of P fertilizer consumption for these land uses (Table S3). The P fertilizer fractions of different land use were calculated at the national level and were linearly interpolated from 1927 to 2014, respectively. We applied these national changing trends of fraction to each state for each land use. Particularly, according to Heffer et al. (2017), permanent pasture and cropland pasture together accounted for 4.0% of total P fertilizer consumption in the US in 2014. We used the ratio of these two pastures in 1964 to split these two pastures from 1964 to 2014. We assumed the state-level ratios before 1927 and after 2014 kept the same as the ratios of 1927 and 2014, respectively.

**Table S2.** Category of P fertilizer use in the US

|                                            | Nonfarm use |                       | Home garden, lawns, etc. |             |
|--------------------------------------------|-------------|-----------------------|--------------------------|-------------|
|                                            |             | Non-agricultural land | Permanent pasture        |             |
| National / state-level<br>P fertilizer use | Farm use    | Agricultural land     | Cropland pasture         |             |
|                                            |             |                       | Corn                     |             |
|                                            |             |                       | Soybean                  |             |
|                                            |             |                       | Winter wheat             |             |
|                                            |             |                       | Spring wheat             |             |
|                                            |             |                       |                          | Cotton      |
|                                            |             |                       |                          | Sorghum     |
|                                            |             |                       |                          | Rice        |
|                                            |             |                       |                          | Barley      |
|                                            |             |                       |                          | Durum wheat |
|                                            |             |                       |                          | Others      |

**Table S3.** Data sources for P fertilizer consumption in nonfarm, permanent pasture, and cropland pasture.

| Data sources                  | Period                          | Land uses      | Resolution |
|-------------------------------|---------------------------------|----------------|------------|
| Mehring et al. (1957)         | 1927, 1938, 1942,<br>1946, 1950 | 3 <sup>a</sup> | Nation     |
| USDA (1957)                   | 1954                            | 3 <sup>a</sup> | State      |
| Ibach et al. (1964)           | 1959                            | 3 <sup>a</sup> | State      |
| Ibach and Adams (1967)        | 1964                            | 3 <sup>a</sup> | State      |
| Brakebill and Grinberg (2017) | 1987-2012                       | 1 <sup>b</sup> | County     |
| Heffer et al. (2017)          | 2015                            | 2 <sup>c</sup> | Nation     |

The number of land uses recorded in different sources varied. <sup>a</sup> includes nonfarm, permanent pasture, and cropland pasture. <sup>b</sup> only includes nonfarm. <sup>c</sup> includes permanent pasture and cropland pasture.

### S3. Historical national and state-level average crop-specific P fertilizer application rate and fertilized area percentage

National average crop-specific P fertilizer application rates from Mehring et al. (1957) include seven crop types, corn, soybeans, wheat (sum of P fertilizer use in spring wheat, winter wheat, and durum wheat), cotton, rice, barley, and cropland pasture. In comparison, USDA (1957), Ibach and Adams (1967), and USDA-ERS (2019) provided P fertilizer application rate in all nine major crops for 1954, 1959, and 1964, including three wheat types and cropland pasture. For the period from 1964 to 2022, USDA reported all nine major crops without cropland pasture. In addition, crop-specific P use reported by Mehring et al. (1957) includes the sum of nitrogen, P, potassium, and trace nutrient fertilizers (Table S4).

**Table S4.** Data sources for national and state-level average crop-specific P fertilizer application rate and percentage of fertilized croplands

| Data sources                     | Period                       | Crop types      | Data form                    |
|----------------------------------|------------------------------|-----------------|------------------------------|
| Mehring et al. (1957)            | 1927, 1938, 1942, 1946, 1950 | 7 <sup>a</sup>  | Total fertilizer consumption |
| USDA (1957)                      | 1954                         | 10 <sup>b</sup> | P use rate                   |
| Ibach et al., (1964)             | 1959                         | 10 <sup>b</sup> | P use rate                   |
| Ibach and Adams. (1967)          | 1964                         | 10 <sup>b</sup> | P use rate                   |
| USDA-ERS (2019) and -NASS (2024) | 1965-2022                    | 9 <sup>c</sup>  | P use rate                   |

The number of crop types recorded in different sources varied. <sup>a</sup>, crops included corn, soybeans, wheat (spring wheat, winter wheat, and durum wheat in total), cotton, rice, barley, and cropland pasture. <sup>b</sup>, crops included all nine major crops and cropland pasture. <sup>c</sup>, crops only included nine major crops but not cropland pasture. Total fertilizer of each crop type reported in Mehring et al. (1957) contained all N, P, K, and trace fertilizers.

### S4. Application timing and method

We derived P fertilizer application timing and method information from the survey conducted by

USDA-ERS (2019). The survey started in 1996 and collected the data periodically for each crop in each state (Table S5). The surveyed years of different crop types in different states might vary.

**Table S5.** The survey years of application timing and method for nine crops

| Crops        | Survey years                |
|--------------|-----------------------------|
| Corn         | 1996-2001, 2005, 2010       |
| Soybeans     | 1996-2000, 2002, 2006, 2012 |
| Winter Wheat | 1996-1998, 2000, 2004, 2009 |
| Spring Wheat | 1996-1998, 2000, 2004, 2009 |
| Cotton       | 1996-2000, 2003, 2007       |
| Sorghum      | 2003, 2011                  |
| Rice         | 2006, 2013                  |
| Barley       | 2003, 2011                  |
| Durum Wheat  | 1996-1998, 2000, 2004, 2009 |

### S5. Divergence between top-down and bottom-up data sources

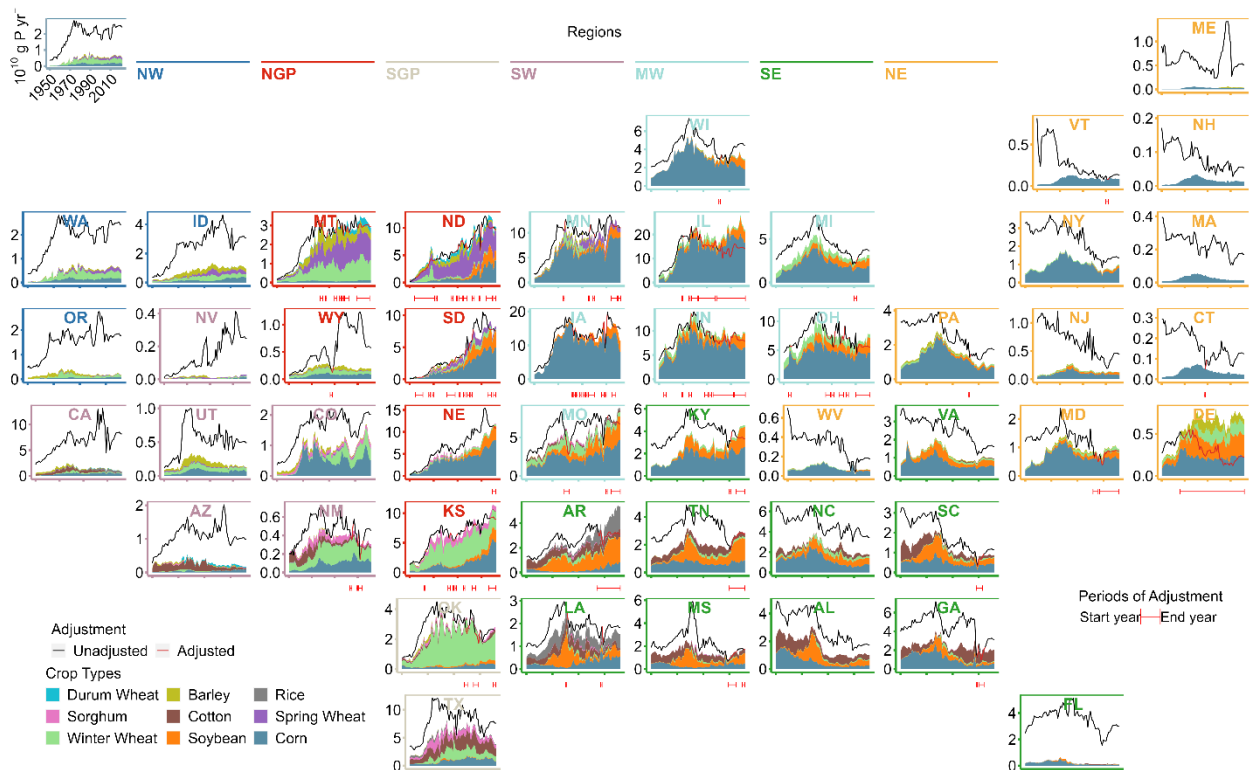

**Figure S1.** Time-series of P fertilizer consumption for each state and 9 major crops from 1950 to 2022. The line in each chart is state total P fertilizer consumption based on sales information

from the top-down source. The red and black colors distinguish between the periods that have been modified and those that have not. The red line with two segments beneath each chart marks the adjustment period. Seven regions include Northwest (NW), Northern Great Plains (NGP), Southern Great Plains (SGP), Southwest (SW), Midwest (MW), Southeast (SE), and Northeast (NE).

### S6. Comparison of P fertilizer consumption across multiple data sources

In Illinois, the state total consumption, as derived from sales information from different top-down sources, exhibited consistent fluctuations during 1986-2021 (Fig. S2). The USDA-NASS (2024) surveyed P fertilizer consumption in corn closely mirrored the state total consumption from 1986 to 2003, aligning with the change in planting area. However, the P consumption of corn largely exceeded state total consumption after 2003, even amidst a substantial decrease in the planting area since 2010. This discrepancy indicates a large disparity between top-down and bottom-up sources. Given the consistency among diverse top-down sources and the mismatch between P consumption and planting area of corn, we adjusted the P fertilizer use rate of corn to bring the P consumption of corn smaller than the state total.

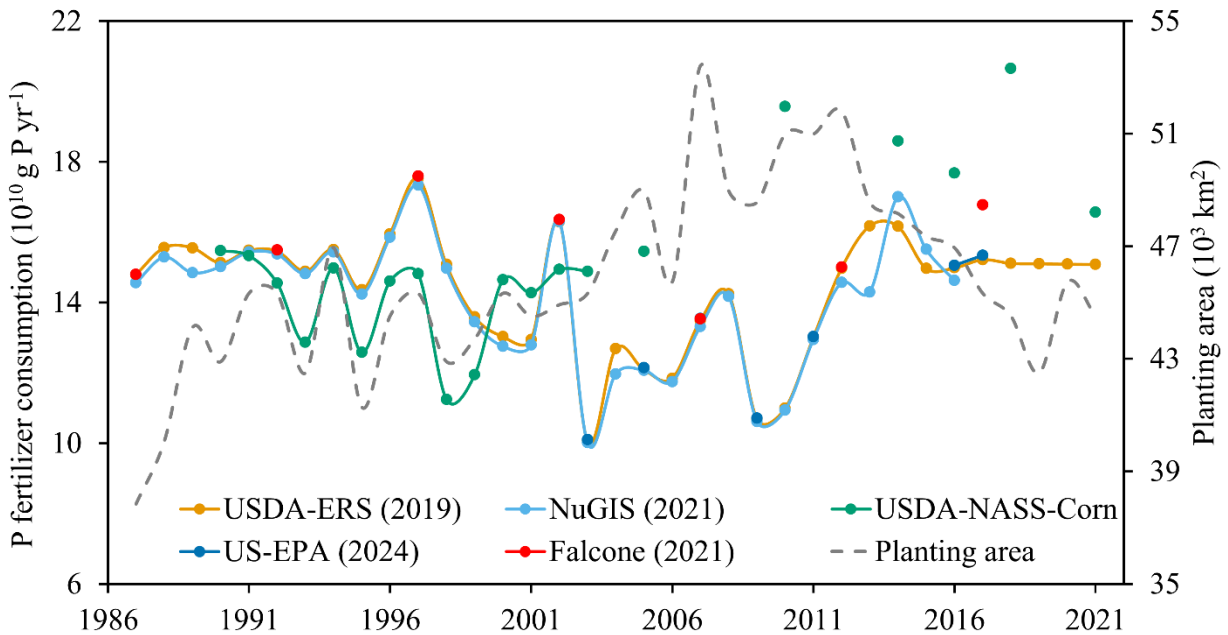

**Figure S2.** Time-series of P fertilizer consumption in corn against total consumption by multiple data sources from 1987 to 2021 in Illinois. NuGIS (2021) only displays farm-used P fertilizer

amount. The P consumption of corn was derived from USDA-NASS Quick Stats, which is the raw data we used for interpolation.

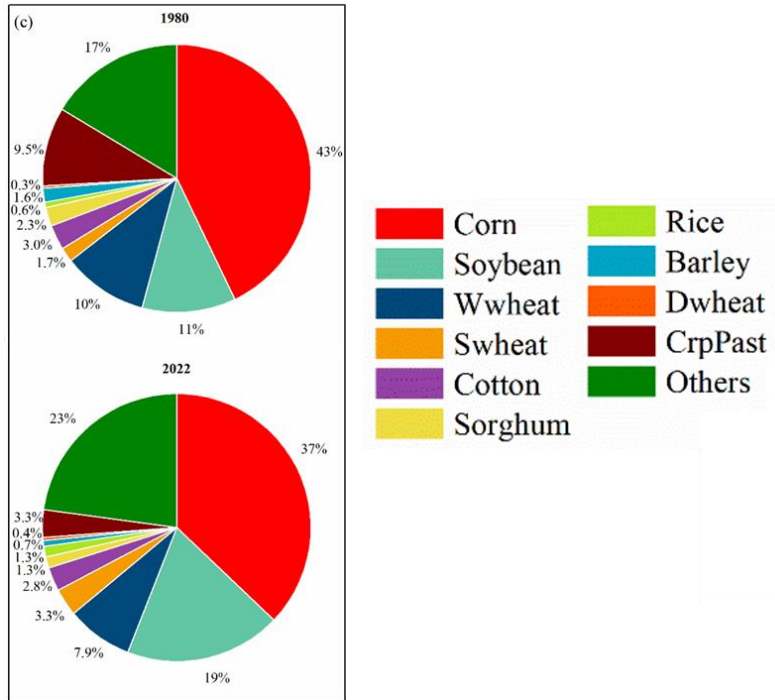

**Figure S3.** County-scale crop specific P fertilizer consumption shares in 1980 and 2022.



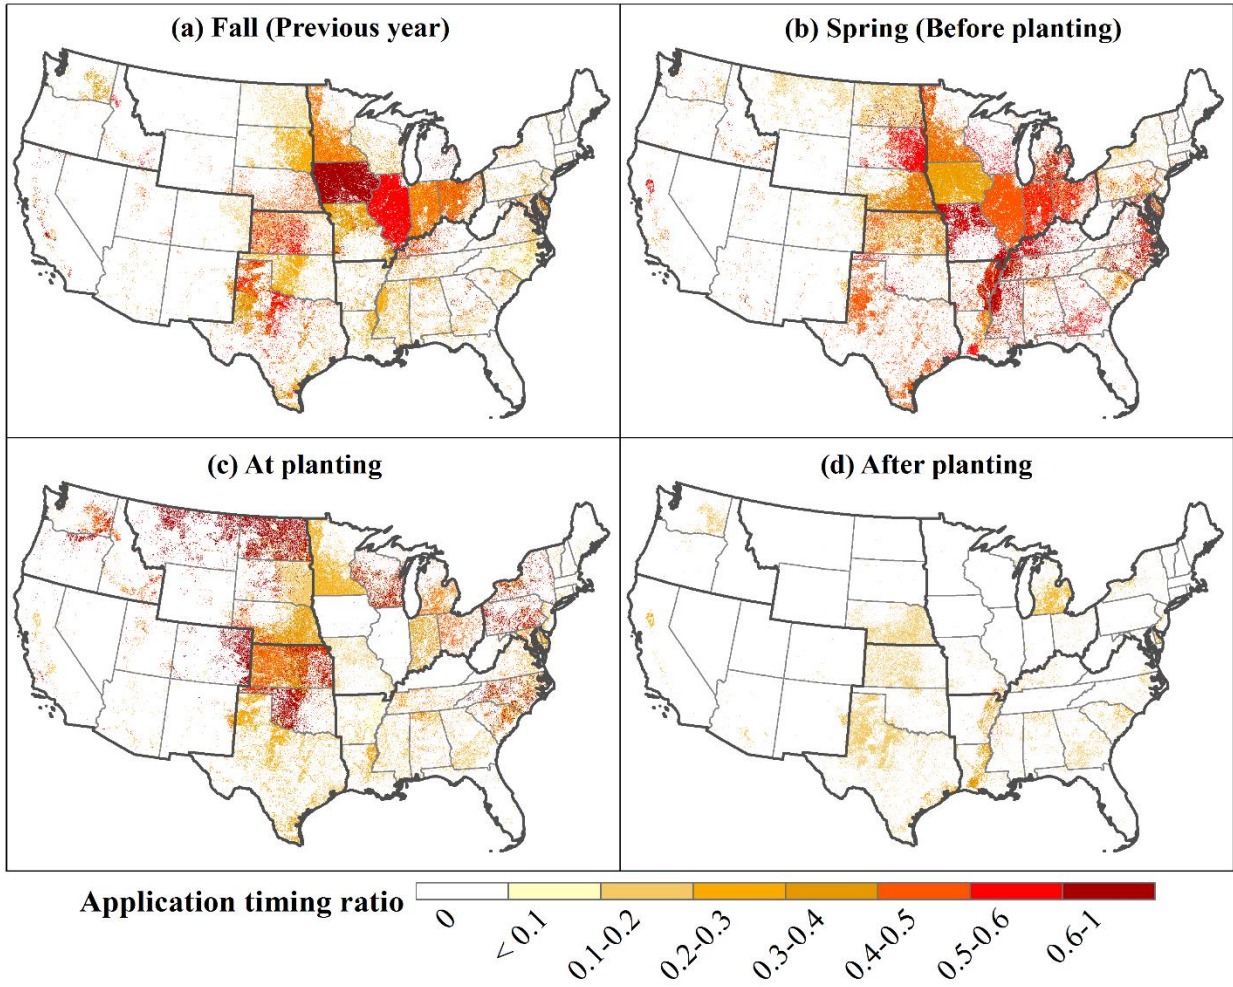

**Figure S4.** Spatial distribution of the fractions at four P fertilizer application timings across the contiguous US in 2020.

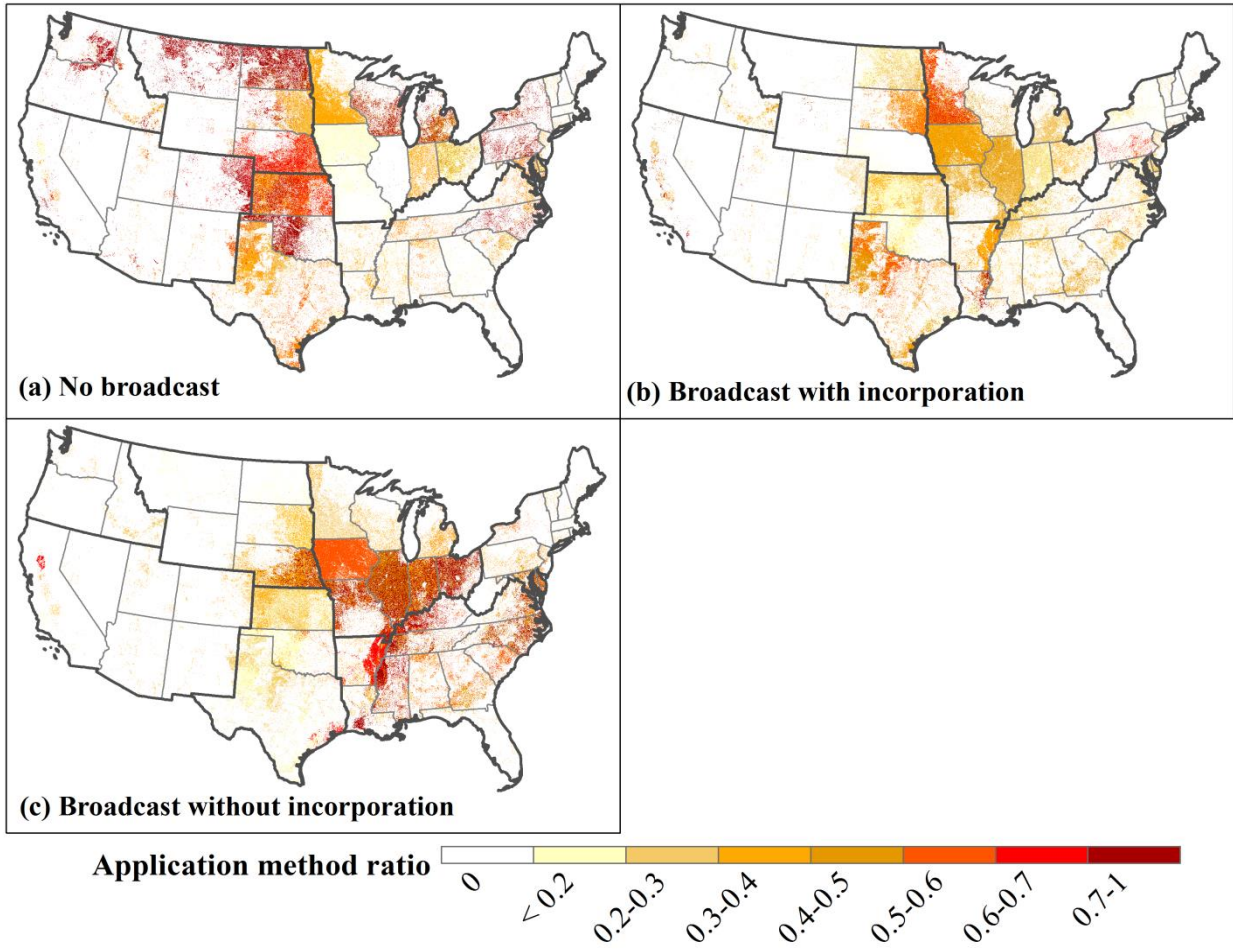

**Figure S5.** Spatial distribution of the fractions in three P fertilizer application methods across the contiguous US in 2020.

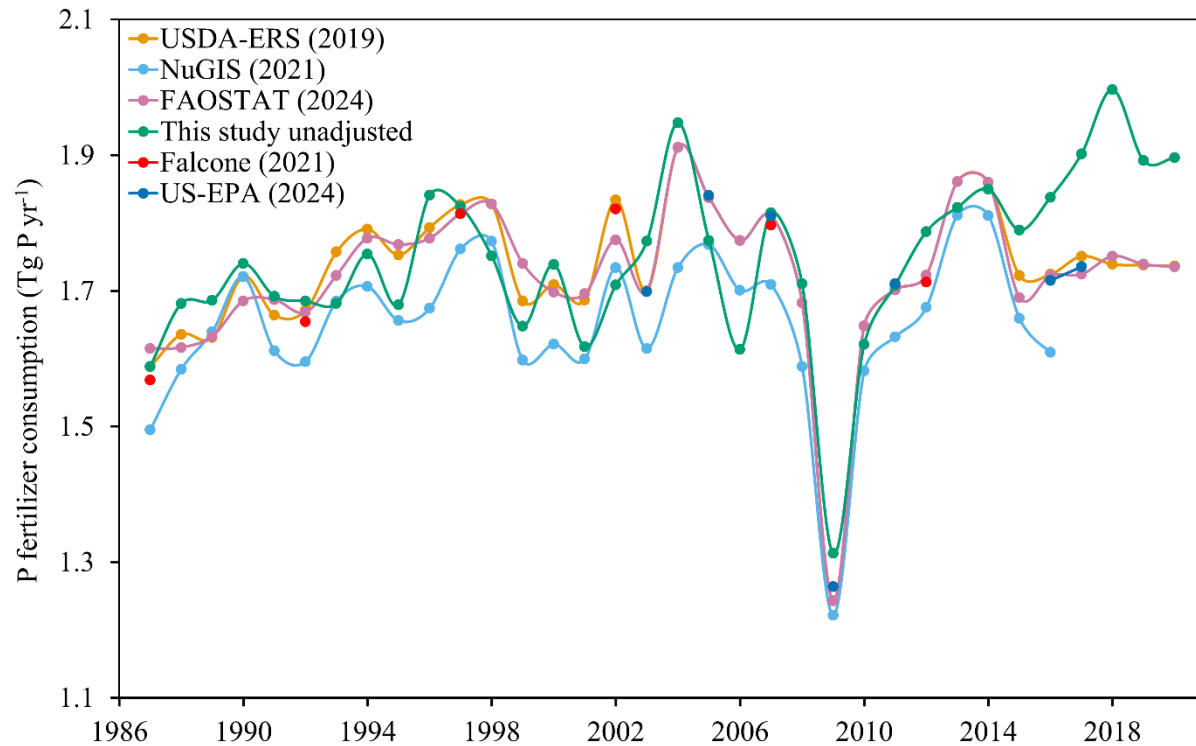

**Figure S6.** Time-series of US total P consumption from 1987 to 2020 in multiple data sources. NuGIS (2021) only displays farm-used P fertilizer amount. The P consumption in this study (green line) is the sum of cropland pasture, non-farm, permanent pasture, and interpolated major crops by excluding Other Crops.

### S7. Fertilized area percentage of P fertilizer among crops in the US

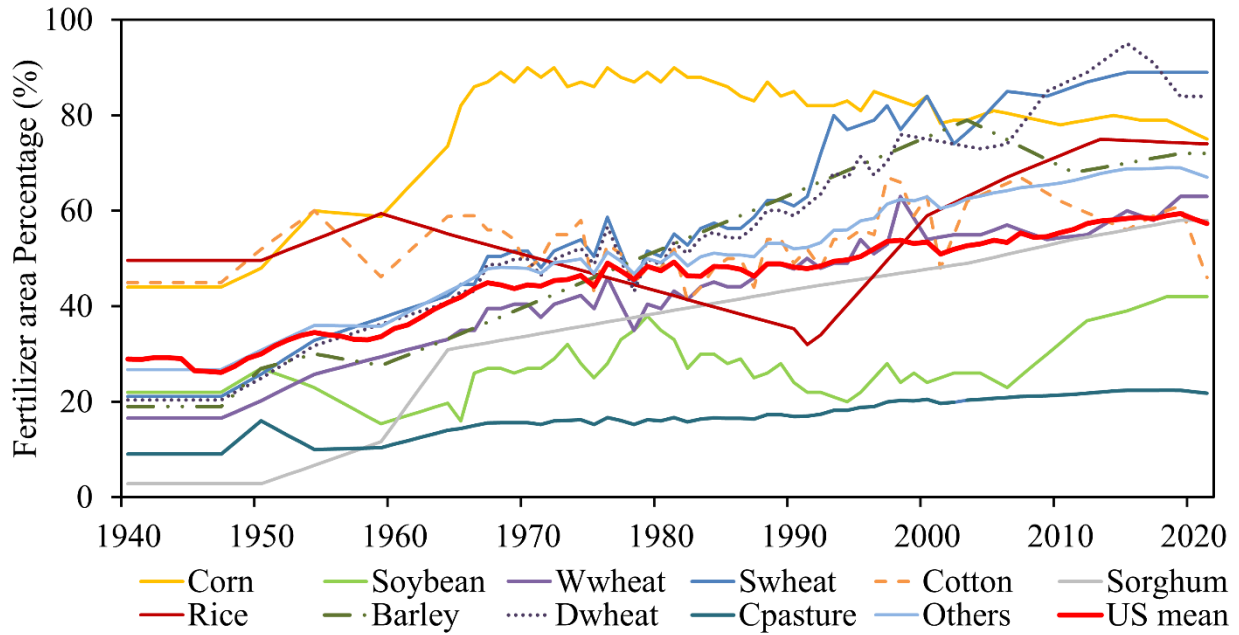

**Figure S7.** Changes in fertilized area percentage of P fertilizer use among crops from 1940 to 2022. Wwheat is winter wheat. Swheat is spring wheat. Dwheat is durum wheat. Cpasture is cropland pasture. US mean is the average of all crops.

## Reference

- Brakebill, J. W. and Gronberg, J. M.: County-Level Estimates of Nitrogen and Phosphorus from Commercial Fertilizer for the Conterminous United States, 1987-2012, U.S. Geological Survey data release, Available at: <https://doi.org/10.5066/F7H41PKX>, last access: 20 January 2024, 2017.
- Cao, P., Lu, C., and Yu, Z.: Historical nitrogen fertilizer use in agricultural ecosystems of the contiguous United States during 1850–2015: application rate, timing, and fertilizer types, *Earth Syst. Sci. Data*, 10, 969–984, <https://doi.org/10.5194/essd-10-969-2018>, 2018.
- Falcone, J. A.: Estimates of county-level nitrogen and phosphorus from fertilizer and manure from 1950 through 2017 in the conterminous United States: U.S. Geological Survey Open-File Report 2020–1153, 20 p., <https://doi.org/10.3133/ofr20201153>, 2021.
- FAOSTAT (Food and Agriculture Organization of the United Nations): FAO online database, available at: <http://www.fao.org/faostat/en/#data/RF>, last access: 20 January 2024, 2024.
- Heffer, P., Gruère, A., and Roberts, T.: Assessment of Fertilizer Use by Crop at the Global Level 2014-2014/15, International Fertilizer Association (IFA) and International Plant Nutrition Institute (IPNI) Report A/17/134 rev, available at: <https://www.ifastat.org/consumption/fertilizer-use-by-crop>, last access: 20 January 2024, 2017.
- Ibach, D. B. and Adams, J. R.: Fertilizer Use in the United States by Crops and Areas, 1964 Estimates, USDA-Economic Research Service and Statistical Reporting Service, Statistical Bulletin No. 408, Washington, D. C., 1967.
- Ibach, D. B., Adams, J. R., and Fox, E. I.: Commercial Fertilizer Used on Crops and Pasture in the United States, 1959 Estimates, USDA-Economic Research Service and Agricultural Research Service, Statistical Bulletin No. 348, Washington, D. C., 1964.
- Mehring, A. L., Adams, J. R., and Jacob, K. D.: Statistics on Fertilizers and Liming Materials in the United States, USDA-Agricultural Research Service, Statistical Bulletin No. 191, Washington, DC, 1957.
- Nutrient Use Geographic Information System (NuGIS), available at: <https://nugis.tfi.org/>, last access: 20 January 2024, 2021.
- US-EPA (U.S.-Environmental Protection Agency): Nutrient Pollution-Commercial Fertilizer Purchased, available at: <https://www.epa.gov/nutrientpollution/commercial-fertilizer-purchased>, last access: 20 January 2024, 2024.
- USDA (U.S. Department of Agriculture): Fertilizer Used on Crops and Pasture in the United States, 1954 Estimates, USDA-Agricultural Research Service, Statistical Bulletin No. 216, Washington, D. C., 1957.
- USDA (U.S. Department of Agriculture): Consumption of Commercial Fertilizers, Primary Plant Nutrients, and Micronutrients, 1850-1969, USDA-Statistical Reporting Service, Crop Reporting Board, Statistical Bulletin No. 472, Washington, D. C., 1971.
- USDA (U.S. Department of Agriculture): Commercial fertilizers consumption for year ended June 30, USDA-Statistical Reporting Service, Crop Reporting Board, Washington, D. C., 1977
- USDA-ERS (U.S. Department of Agriculture-Economic Research Service): Fertilizer Use and

Price, available at: <https://www.ers.usda.gov/data-products/fertilizer-use-and-price/>, last access: 20 January 2024, 2019.

USDA-ERS (U.S. Department of Agriculture-Economic Research Service): Tailored Reports: Crop Production Practices, available at: <https://www.ers.usda.gov/data-products/arms-farm-financial-and-crop-production-practices/>, last access: 20 January 2024, 2019.

USDA-NASS (U.S. Department of Agriculture-National Agricultural Statistics Service): Agricultural Chemical Use Program, available at: [https://www.nass.usda.gov/Surveys/Guide\\_to\\_NASS\\_Surveys/Chemical\\_Use/index.php](https://www.nass.usda.gov/Surveys/Guide_to_NASS_Surveys/Chemical_Use/index.php), last access: 20 January 2024, 2024.
